# Supplementary material
Source: Springer Nature journal article supplement (https://www.springermedizin.de/resource/supplementary/12936_2009_1116_MOESM2_ESM.pdf/9549790)
Supplement: MOESM2 [file 9549790]

**a**

| Minimum particle size (pixels <sup>2</sup> ) | 1      | 2      | 3     | 4     | 6     | 8     |
|----------------------------------------------|--------|--------|-------|-------|-------|-------|
| Macro count                                  | 897.29 | 103.96 | 86.53 | 80.36 | 71.78 | 65.83 |
| Manual count x100                            |        |        |       |       |       |       |

**d**

|        |   | Manual     |            |
|--------|---|------------|------------|
|        |   | +          | -          |
| Macro+ | + | ✓          | False +ves |
|        | - | False -ves |            |

**b**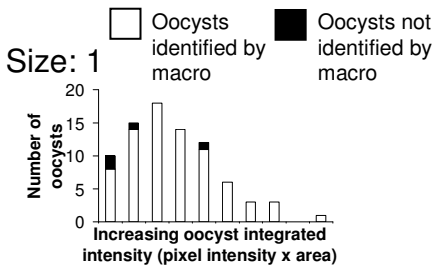**c**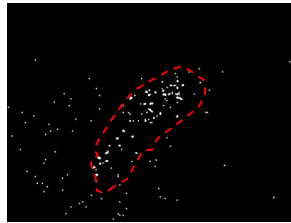

Size: 2

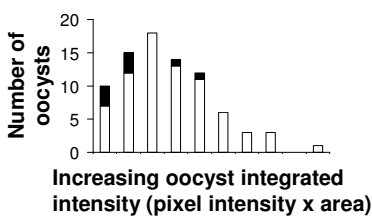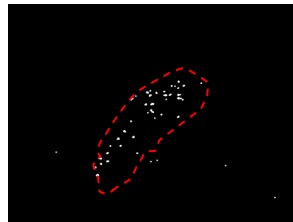

Size: 3

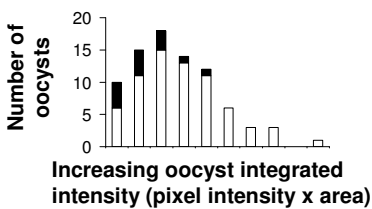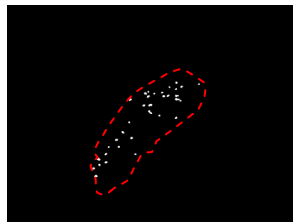

Size: 4

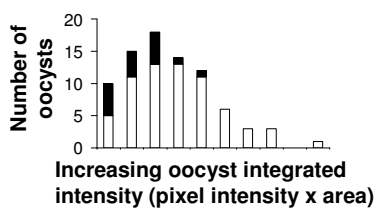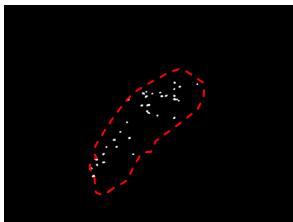

Size: 6

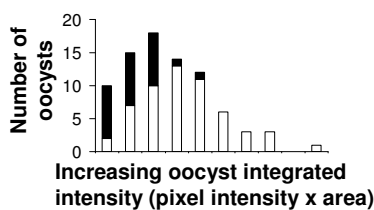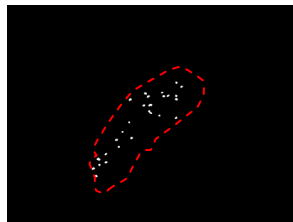

Size: 8

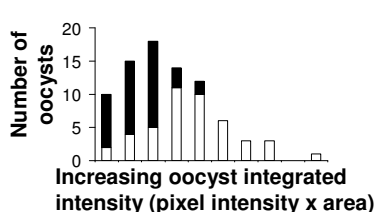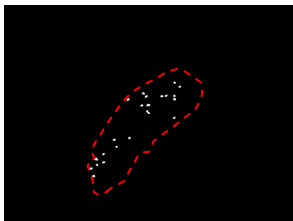

|    |     |
|----|-----|
| 78 | 347 |
| 4  | -   |

|    |    |
|----|----|
| 74 | 32 |
| 8  | -  |

|    |   |
|----|---|
| 69 | 4 |
| 13 | - |

|    |   |
|----|---|
| 66 | 0 |
| 16 | - |

|    |   |
|----|---|
| 56 | 0 |
| 26 | - |

|    |   |
|----|---|
| 49 | 0 |
| 33 | - |
